# Supplementary material
Source: publisher site journal article supplement (https://www.dovepress.com/article/468942)
Supplement: Supplementary file 1 [file get_supplementary_file.php]

1. **Determination of ANG using UPLC**

UPLC analysis was performed using a ACQUITY H Class UPLC system (Waters, MA, USA). A Waters ACQUITY UPLC CSH130 C18 column (2.1 × 100 mm, 1.7 μm particle size) was used for separation. The mobile phase, pumped at a flow rate of 0.3 mL/min, consisted of solvents B (0.1% formic acid in acetonitrile), C (water) and D (0.1% formic acid in water), with the following proportions of solvent B and C in the 10 min gradient elution program:0~1 min, 2% B and 9.8% C, 1~2 min, 2~10% B and 9.8~9.0%C, 2~7 min, 10~15% B and 9.0~8.5% C, 7~7.5 min, 15~50% B and 8.5~5% C, 7.5~8.0 min, 50~2% B, 5.0~9.8% C, 8~10 min, 2% B and 9.8% C. The injection volume was 10 μL. The UV detection was measured at 275.8 nm.

1. **Determination of ECH using UPLC**

UPLC analysis was performed using a ACQUITY H Class UPLC system (Waters, MA, USA). A Waters ACQUITY UPLC BEH C18 column (2.1 × 50 mm, 1.7 μm particle size) was used for separation. The mobile phase, pumped at a flow rate of 0.4 mL/min, consisted of solvents A (0.1% formic acid in water) and B (acetonitrile), with the following proportions of solvent B in the 10 min gradient elution program: 10% for 0 min, linearly increased to 50% in 5 min, a fast increase to 70% in 0.5 min, reversal to starting conditions. The injection volume was 1 μL. The UV detection was measured at 330 nm.

1. **Determination of ECH using UPLC**-**MS/MS**

The UPLC-MS/MS system utilized in this study consisted of an ExionLC AC UPLC system (AB SCIEX, Framingham, MA, USA), which was conjugated to an API 6500+ triple quadrupole mass spectrometer (AB SCIEX, Framingham, MA, USA). To facilitate the separation of compounds, a Waters ACQUITY UPLC BEH C18 column measuring 2.1 × 50 mm and containing particles with a size of 1.7 μm was employed. The column oven temperature was set at 40℃, while the autosampler temperature was maintained at 15℃. The mobile phase was composed of two solvents: solvent A, consisting of water with 0.1% formic acid, and solvent B, which was acetonitrile. The solvent B’ gradient elution program lasted for 10 min and involved the following proportions: 10% for 0 min, linearly increased to 30% in 6 min, a rapid increase to 90% in 1.1 min, maintenance at 90% for 1 min, and finally, a return to the starting conditions while the pumping rate exhibited a flow of 0.3 mL/min. The API 6500+ mass spectrometer was equipped with an ESI source (Ion DriveTM TurboV) and operated in negative mode. The source temperature was set at 550℃, and the ion spray voltage at -4500 V. Gas pressure setting was 55 psi for gas 1 and gas 2, and 40 psi for the curtain gas. The arbitrary vacuum setting for collision-activated dissociation was 6 Pa. The analytes were identified through the utilization of the scheduled multiple reaction monitoring (MRM) mode. **Table S1** presents the MRM transitions and optimized mass spectrometric parameters for ECH and the internal standards.

**Table S1.** MRM transitions and optimized conditions

| Analyte | tR/min | Precursor ion (m/z) | Product ion (m/z) | DP/V | CE/V |
| --- | --- | --- | --- | --- | --- |
| Echinacoside | 3.40 | 785.2 | 623.0 | -230 | -52 |
| Verbascoside(IS) | 4.35 | 623.2 | 161.0 | -240 | -44 |

1. **Determination of the levels of dopamine and its metabolites using UPLC**-**MS/MS**

The separation procedure employed a Waters ACQUITY UPLC CSH C18 column measuring 2.1 × 100 mm and containing particles with a size of 1.7 μm. The temperature of the column oven was set to 40℃, whereas the autosampler was adjusted to 4℃. The mobile phase was administered at a flow rate of 0.2 mL/min and comprised of solvents A and B. Solvent A was composed of 0.1% formic acid in water with 10 mM ammonium formate, while solvent B was acetonitrile. The gradient elution program of solvent B lasted for 10 minutes and involved varying proportions of solvent B. The initial concentration was set at 5% for a duration of 0 min, which was then maintained for an additional 1 min. Subsequently, the concentration was linearly increased over a period of 8 min until it reached 95%. Finally, the conditions were reversed back to the initial concentration.

The mass spectrometer in this study was the API 6500+ model, which was equipped with an ESI source known as Ion DriveTM TurboV. The instrument was utilized in a mode of positive ionization. The temperature of the source was adjusted to 550℃, while the ion spray voltage was set to 4500 V. The gas pressure setting for gas 1 and gas 2 was recorded as 55 psi, while the curtain gas was adjusted to 40 psi. The vacuum pressure utilized for collision-activated dissociation was set at 6 Pa. The analytes were identified through the utilization of the scheduled MRM mode. The MRM transitions and optimized mass spectrometric parameters for dopamine and its metabolites are listed in **Table S2**.

**Table S2.** MRM transitions and optimized conditions

| Analyte | tR/min | Precursor ion (m/z) | Product ion (m/z) | DP/V | CE/V |
| --- | --- | --- | --- | --- | --- |
| Dopamine | 1.69 | 154.4 | 137.0 | 30 | 16 |
| DOPAC | 0.20 | 151.3 | 105.1 | 106 | 25 |
| HVA | 0.20 | 183.3 | 137.0 | 90 | 21 |


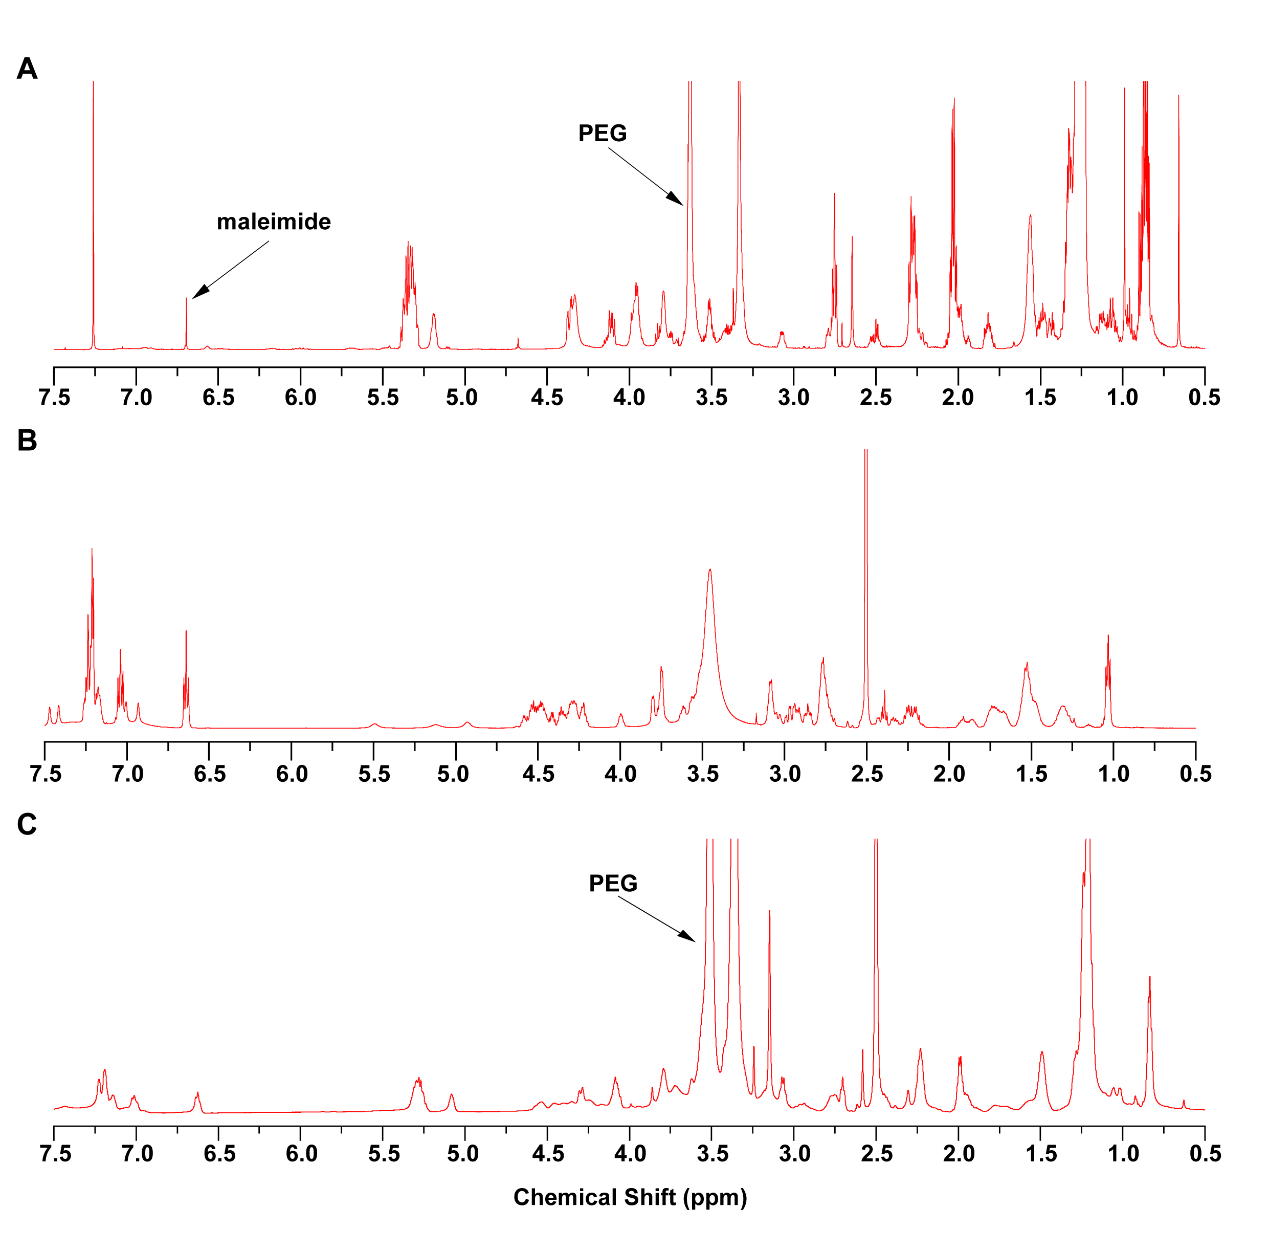
**Fig. S1.** 1H NMR spectra of MAL-Lip **(A)**, ANG **(B),** and ANG-Lip **(C)**. The MAL-Lip was dissolved in CDCl3; the ANG was dissolved in DMSO-d6, and the ANG-Lip was dissolved in a mixture (5:1) of DMSO-d6 and CDCl3.


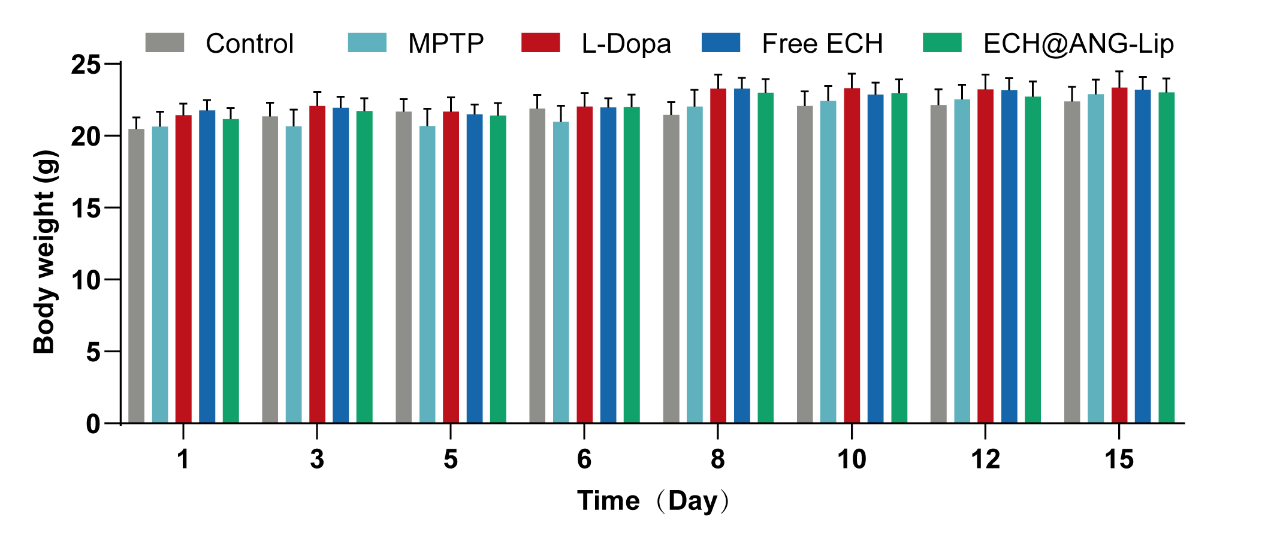


**Fig. S2**. Body weight of treated mice were monitored (n = 12)


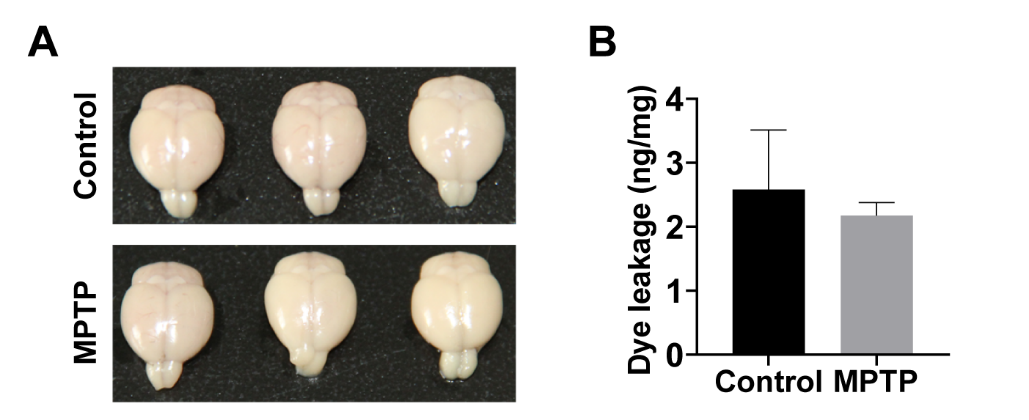


**Fig.S3.** Evaluation of BBB leakage using Evans blue with MPTP-treated and untreated mice **(A)** Photographs of brain tissues. (**B)** The level of Evans blue in brain tissues 0.5 h following intravenous injection. Data are mean ± SD (n=3).
